# Supplementary material for: Th17 micro-milieu regulates NLRP1-dependent caspase-5 activity in skin autoinflammation
Source: PubMed Central journal article supplement (PMC5396864; doi:10.1371/journal.pone.0175153), 2017-04-19

A

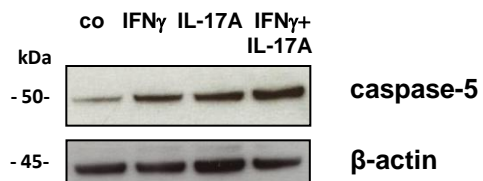

B

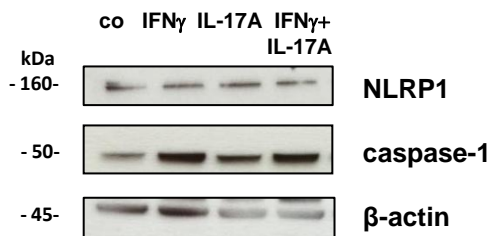

C

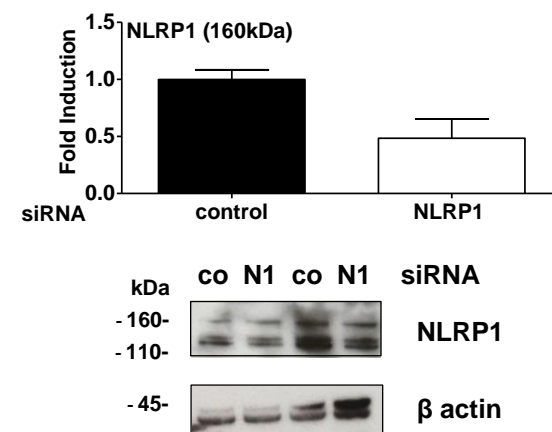

D

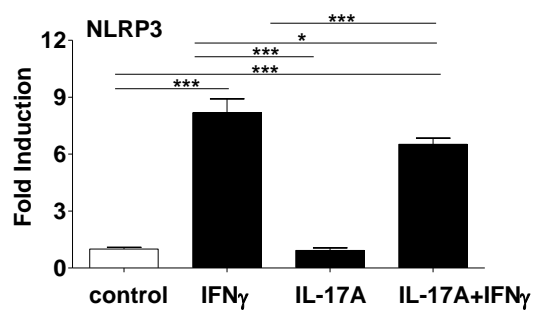

E

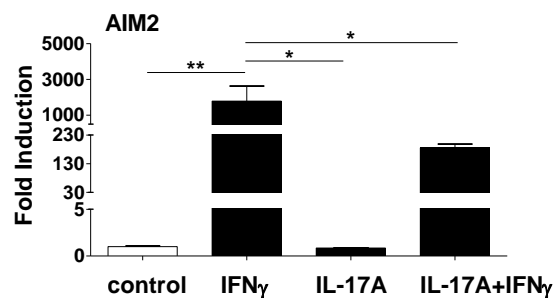

Supplement: pone.0175153.s003.pdf [file pone.0175153.s003.pdf]
